# Supplementary material for: Intermolecular hydrogen bonds induce restriction of access to the dark state for triggering aggregation-induced emission
Source: Royal Society of Chemistry journal article supplement (doi:10.1039/d2tc00085g), 2022-01-01
Supplement: d2tc00085g1.pdf [file d2tc00085g1.pdf]

**Electronic Supplementary Material (ESI) for J. Mater. Chem. C**

**This journal is © The Royal Society of Chemistry 2022**

**Intermolecular Hydrogen Bond induce Restriction of Access to Dark State for Triggering  
Aggregation-Induced Emission**

Longjie Wang,<sup>‡a</sup> Yu Qin, <sup>‡b</sup> Yi Cheng,<sup>a</sup> Wenwen Fan,<sup>a</sup> Shaoxiong Yang,<sup>a</sup> Liyan Zheng,<sup>\*a</sup> and Qiue  
Cao<sup>\*a</sup>

a.Key Laboratory of Medicinal Chemistry for Natural Resource, Ministry of Education. Yunnan  
Provincial Center for Research & Development of Natural Products. School of Chemical Science  
and Technology, Yunnan University, No. 2 North Cuihu Road, Kunming, 650091 (P.R. China)

b.Pharmacy College, Chongqing Engineering Research Center of Pharmaceutical Sciences,  
Chongqing Medical and Pharmaceutical College, Chongqing, China 401331

<sup>‡</sup> These authors contributed equally to this work.

# Materials

All chemicals and reagents are purchased from the market and supplied by Aladdin Company. The final products used in all experiments were purified on the silica gel column and recrystallized at least twice.

# Measurement

<sup>1</sup>H, <sup>13</sup>C-NMR spectra were recorded on AVANCE DRX 400 spectrometer (Bruker, German). HPLC-MS were measured by electrospray ionization mass spectra were obtained with a High Performance 1100 Liquid Chromatography-Mass Spectrometer (Agilent Technologies, USA). A C18 column (250 mm\* 4.6 mm, 5 μm, Hypersil GOLD, USA) was deployed as stationary phase. Digital photos were taken with the iPhone XR smartphone. Single-crystal X-ray diffraction (XRD) data were collected on a Rigaku Oxford Diffraction Supernova with Atlas Diffractometer, and crystal structures were solved with Olex2. Fluorescence spectra in the range of 300-700 nm were recorded with the F-4700 fluorescence spectrophotometer (HITACHI, Japan) at room temperature. Fluorescence decay curves measured by 285 nm and 390 nm excitation from Nano LED lamp on Horiba Jobin Yvon Fluorolog-3 spectrofluorometer. Fluorescence spectra, phosphorescence spectra and fluorescence quantum yields were measured on Horiba Jobin Yvon Fluorolog-3 spectrofluorometer. The size of nanoparticles in the solution was determined by NanoBrook Omni (Bruker, USA).

# Computational Details

All the compounds were fully optimized with the density functional theory (DFT) in gaussian 09 method by using ω-b97xd density functional and Def2-TZVP basis set.<sup>1</sup> The SMD implicit solvation model is used to simulate the effect of solvent molecules on molecular properties through dielectric constant refraction. The natural transition orbits of excited electrons are analyzed by using Multiwfn and VMD programs.<sup>2</sup> The Hirshfeld surfaces and decomposed fingerprint plots were calculated and mapped using CrystalExplorer 17.5 package.<sup>3</sup> Single crystal analysis by olex2 software.<sup>4</sup>

# Compounds Synthesis Method

## 1-(4-(quinolin-8-yl) phenyl) ethan-1-one (QLP-8)

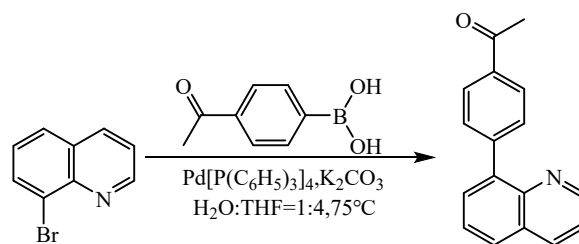

8-bromoquinoline (5.00 mmol, 1.0300 g) and (4-acetyl phenyl) boronic acid (7.00 mmol, 1.1480 g) were added into a 100.0 mL two-necked flask with 20.0 ml THF, potassium carbonate (0.5000 g, 3.62 mmol) were dissolved in 5.0 mL water ( $V_{\text{THF}}: V_{\text{H}_2\text{O}} = 4:1$ ), mixed two solutions then add (0.10 mmol, 0.1156 g) (beta-4)-platinum. After stirring at 75 °C for 48 h under nitrogen gas, the reaction mixture was diluted with water and extracted with ethyl acetate. The organic layer was separated, washed with water and brine, dried with enough anhydrous sodium sulphate. After filtration, the filtrate was evaporated under reduced pressure and the crude product was purified on a silica gel column using petroleum/ether ethyl acetate (10/1, v/v) as eluent. 0.9900 g of QLP-8 was obtained as a colorless powder with 80.0% yield. The single crystal was obtained by recrystallization from the mixed solution of ethanol and water.  $^1\text{H}$  NMR (400 MHz, Chloroform-*d*)  $\delta$ (ppm): 8.95 (dd,  $J = 4.2, 1.8$  Hz, 1H), 8.23 (dd,  $J = 8.3, 1.8$  Hz, 1H), 8.12 – 8.02 (m, 2H), 7.87 (dd,  $J = 8.1, 1.5$  Hz, 1H), 7.84 – 7.78 (m, 2H), 7.78 – 7.68 (m, 1H), 7.63 (dd,  $J = 8.1, 7.2$  Hz, 1H), 7.44 (dd,  $J = 8.3, 4.2$  Hz, 1H), 2.66 (s, 3H).  $^{13}\text{C}$  NMR (400 MHz, Chloroform-*d*)  $\delta$ (ppm): 198.02, 150.50, 144.59, 144.36, 139.72, 136.63, 136.43, 135.94, 130.91, 130.36, 128.80, 128.38, 128.09, 126.32, 121.28, 77.27, 26.74. HRMS:  $m/z$ : calculated for  $\text{C}_{17}\text{H}_{13}\text{NO}$ : 247.0997; found: 270.0898  $[\text{M}+\text{Na}]^+$ .

## 1-(4-(quinolin-5-yl) phenyl)ethan-1-one (QLP-5)

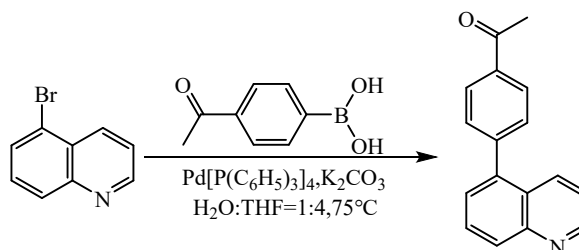

5-bromoquinoline (5.00 mmol, 1.0300 g) and (4-acetyl phenyl) boronic acid (7.00 mmol, 1.1480 g) were added into a 100.0 mL two-necked flask with 20.0 ml THF, potassium carbonate (0.5000 g, 3.62 mmol) were dissolved in 5.0 mL water ( $V_{\text{THF}}: V_{\text{H}_2\text{O}} = 4:1$ ), mixed two solutions then add (0.10 mmol, 0.1156 g) (beta-4)-platinum. After stirring at 75 °C for 48 h under nitrogen gas, the reaction mixture was diluted with water and extracted with ethyl acetate. The organic layer was separated, washed with water and brine, dried with enough anhydrous sodium sulphate. After filtration, the filtrate was evaporated under reduced pressure and the crude product was purified on a silica gel column using petroleum/ether ethyl acetate (5/1, v/v) as eluent. 1.0100 g of QLP-5 was obtained as colorless powder with 82.3% yield. The pure powder was dissolved in a mixture of ethyl acetate and *n*-hexane and evaporated slowly for one week to obtain single crystal.  $^1\text{H}$  NMR (400 MHz, Chloroform-*d*)  $\delta$ (ppm): 8.95 (dd,  $J = 4.2, 1.7$  Hz, 1H), 8.23 – 8.14 (m, 2H), 8.14 – 8.07 (m, 2H), 7.78 (dd,  $J = 8.5, 7.1$  Hz, 1H), 7.61 – 7.55 (m, 2H), 7.52 (dd,  $J = 7.1, 1.2$  Hz, 1H), 7.38 (dd,  $J = 8.6, 4.2$  Hz, 1H), 2.69 (s, 3H).  $^{13}\text{C}$  NMR (400 MHz, Chloroform-*d*)  $\delta$ (ppm) : 197.68, 150.45, 148.49, 144.27,

139.27, 136.38, 133.94, 130.31, 129.72, 128.95, 128.55, 127.35, 126.39, 121.38, 77.28, 26.73. HRMS:  $m/z$ : calculated for  $C_{17}H_{13}NO$ :247.0997; found: 270.0893  $[M+Na]^+$ .

## 1-(4-(isoquinolin-5-yl)phenyl)ethan-1-one (IQL-5)

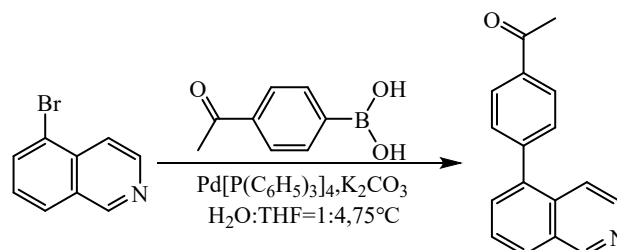

5-bromoisoquinoline (5.00 mmol, 1.0300 g) and (4-acetyl phenyl) boronic acid (7.00 mmol, 1.1480 g) were added into a 100.0 mL two-necked flask with 20.0 ml THF, potassium carbonate (0.5000 g, 3.62 mmol) were dissolved in 5.0 mL water ( $V_{THF}: V_{H_2O} = 4:1$ ), mixed two solutions then add (0.10 mmol, 0.1156 g) (beta-4)-platinum. After stirring at  $75^\circ C$  for 48 h under nitrogen gas, the reaction mixture was diluted with water and extracted with ethyl acetate. The organic layer was separated, washed with water and brine, dried with enough anhydrous sodium sulphate. After filtration, the filtrate was evaporated under reduced pressure and the crude product was purified on a silica gel column using petroleum/ether ethyl acetate (10/1, v/v) as eluent. 0.9800 g of IQL-5 was obtained as colorless powder with 78.9% yield. The pure powder was dissolved in a mixture of ethyl acetate and *n*-hexane and evaporated slowly for three days to obtain single crystal.  $^1H$  NMR (400 MHz, Chloroform-*d*)  $\delta$ (ppm): 9.34 (s, 1H), 8.52 (d,  $J = 6.0$  Hz, 1H), 8.12 (d,  $J = 7.8$  Hz, 2H), 8.04 (dd,  $J = 6.7, 2.7$  Hz, 1H), 7.74 – 7.65 (m, 3H), 7.60 (d,  $J = 8.6$  Hz, 2H), 2.75 (s, 0H), 2.70 (s, 3H).  $^{13}C$  NMR (400 MHz, Chloroform-*d*)  $\delta$ (ppm): 197.71, 152.98, 143.90, 143.63, 138.01, 136.42, 133.79, 131.02, 130.16, 128.91, 128.63, 127.95, 126.87, 118.15, 77.24, 26.76.  $C_{17}H_{13}NO$ :247.0997; found: 270.0872 $[M+Na]^+$ .

## 1-(4-(benzo[c] [1,2,5] thiadiazol-4-yl) phenyl) ethan-1-one (BTD-4)

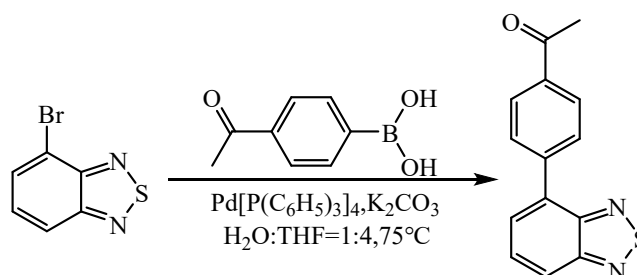

4-bromobenzo[c][1,2,5] thiadiazole (5.00 mmol, 1.0700 g) and (4-acetyl phenyl) boronic acid (7.00 mmol, 1.1480 g) were added into a 100.0 mL two-necked flask with 20.0 ml THF, potassium carbonate (0.5000 g, 3.62 mmol) were dissolved in 5.0 mL water ( $V_{THF}: V_{H_2O} = 4:1$ ), mixed two

solutions then add (0.10 mmol, 0.1156 g) (beta-4)-platinum. After stirring at 75 °C for 48 h under nitrogen gas, the reaction mixture was diluted with water and extracted with ethyl acetate. The organic layer was separated, washed with water and brine, dried with enough anhydrous sodium sulphate. After filtration, the filtrate was evaporated under reduced pressure and the crude product was purified on a silica gel column using petroleum/ether ethyl acetate (20/1, v/v) as eluent. 0.6400 g of BTD-4 was obtained as green powder with 54.0% yield. The pure powder was dissolved in a mixture of ethyl acetate and n-hexane and evaporated slowly for two days to obtain single crystal. <sup>1</sup>H NMR (400 MHz, Chloroform-*d*) δ 8.12 (d, *J* = 6.5 Hz, 1H), 8.11 (s, 1H), 8.06 (d, *J* = 4.5 Hz, 2H), 8.04 – 8.02 (m, 1H), 7.77 – 7.68 (m, 2H), 2.67 (s, 3H). <sup>13</sup>C NMR (400 MHz, Chloroform-*d*) δ 197.67, 155.56, 141.88, 133.27, 129.48, 128.60, 128.24, 121.49, 77.24, 26.72. C<sub>14</sub>H<sub>10</sub>N<sub>2</sub>OS:254.0514; found: 255.0592 [M+H]<sup>+</sup>.

## 1-(4-(naphthalen-1-yl) phenyl) ethan-1-one (NTP-1)

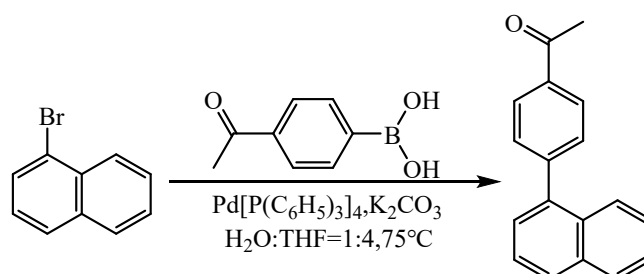

1-bromonaphthalene (5.00 mmol, 1.0500 g) and (4-acetyl phenyl) boronic acid (7.00 mmol, 1.1480 g) were added into a 100.0 mL two-necked flask with 20.0 ml THF, potassium carbonate (0.5000 g, 3.62 mmol) were dissolved in 5.0 mL water ( $V_{\text{THF}}:V_{\text{H}_2\text{O}} = 4:1$ ), mixed two solutions then add (0.10 mmol, 0.1156 g) (beta-4)-platinum. After stirring at 75 °C for 48 h under nitrogen gas, the reaction mixture was diluted with water and extracted with ethyl acetate. The organic layer was separated, washed with water and brine, dried with enough anhydrous sodium sulphate. After filtration, the filtrate was evaporated under reduced pressure and the crude product was purified on a silica gel column using petroleum/ether ethyl acetate (50/1, v/v) as eluent. 1.0200 g of NTP-1 was obtained as colorless powder with 82.3% yield. <sup>1</sup>H NMR (400 MHz, Chloroform-*d*) δ(ppm): 8.09 (d, *J* = 8.4 Hz, 2H), 7.91 (t, *J* = 9.7 Hz, 2H), 7.84 (d, *J* = 8.4 Hz, 1H), 7.61 (d, *J* = 6.4 Hz, 2H), 7.53 (dt, *J* = 11.7, 7.6 Hz, 2H), 7.47 – 7.41 (m, 2H), 2.69 (s, 3H). <sup>13</sup>C NMR (400 MHz, Chloroform-*d*) δ(ppm): 197.90, 145.82, 139.03, 136.00, 133.80, 131.21, 130.34, 128.45, 128.39, 128.38, 126.95, 126.41, 126.03, 125.58, 125.37, 26.75. C<sub>18</sub>H<sub>14</sub>O:246.1045; found: 247.1127 [M+H]<sup>+</sup>.

## 4-(quinolin-5-yl) benzaldehyde (QLB-8)

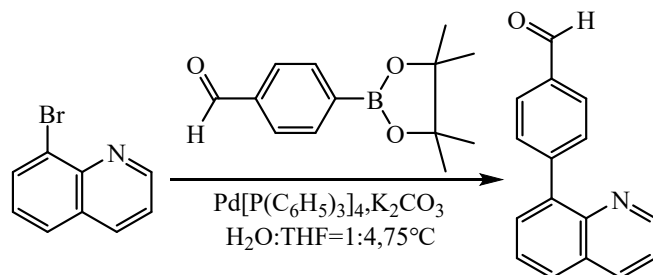

4-(4,4,5,5-tetramethyl-1,3,2-dioxaborolan-2-yl) benzaldehyde (7.00 mmol, 1.6250 g) and 8-bromoquinoline (5.00 mmol, 1.0300 g) and were added into a 100.0 mL two-necked flask with 20.0 ml THF, potassium carbonate (0.5000 g, 3.62 mmol) were dissolved in 5.0 mL water ( $V_{\text{THF}}: V_{\text{H}_2\text{O}} = 4:1$ ), mixed two solutions then add (0.10 mmol, 0.1156 g) (beta-4)-platinum. After stirring at 75 °C for 48 h under nitrogen gas, the reaction mixture was diluted with water and extracted with ethyl acetate. The organic layer was separated, washed with water and brine, dried with enough anhydrous sodium sulphate. After filtration, the filtrate was evaporated under reduced pressure and the crude product was purified on a silica gel column using petroleum/ether ethyl acetate (3/1, v/v) as eluent. 0.9900 g of QLB-8 was obtained as colorless powder with 85.0% yield. Crystals are obtained by recrystallization of pure powders using ethanol and water as mixed solvents. <sup>1</sup>H NMR (400 MHz, Chloroform-*d*) δ(ppm): 10.10 (s, 1H), 8.96 – 8.95 (m, 1H), 8.24 (d, *J* = 6.5 Hz, 1H), 8.01 (d, *J* = 6.0 Hz, 2H), 7.89 (d, *J* = 3.1 Hz, 3H), 7.76 (d, *J* = 5.6 Hz, 1H), 7.64 (d, *J* = 1.1 Hz, 1H), 7.45 (d, *J* = 4.2 Hz, 1H). <sup>13</sup>C NMR (400 MHz, Chloroform-*d*) δ(ppm): 192.26, 150.56, 146.04, 145.74, 139.49, 136.44, 135.23, 131.37, 130.38, 129.44, 128.78, 128.59, 126.32, 121.36. C<sub>16</sub>H<sub>11</sub>NO:233.0841; found: 234.0932 [M+H]<sup>+</sup>.

# Nuclear Magnetic Resonance (NMR) Spectra

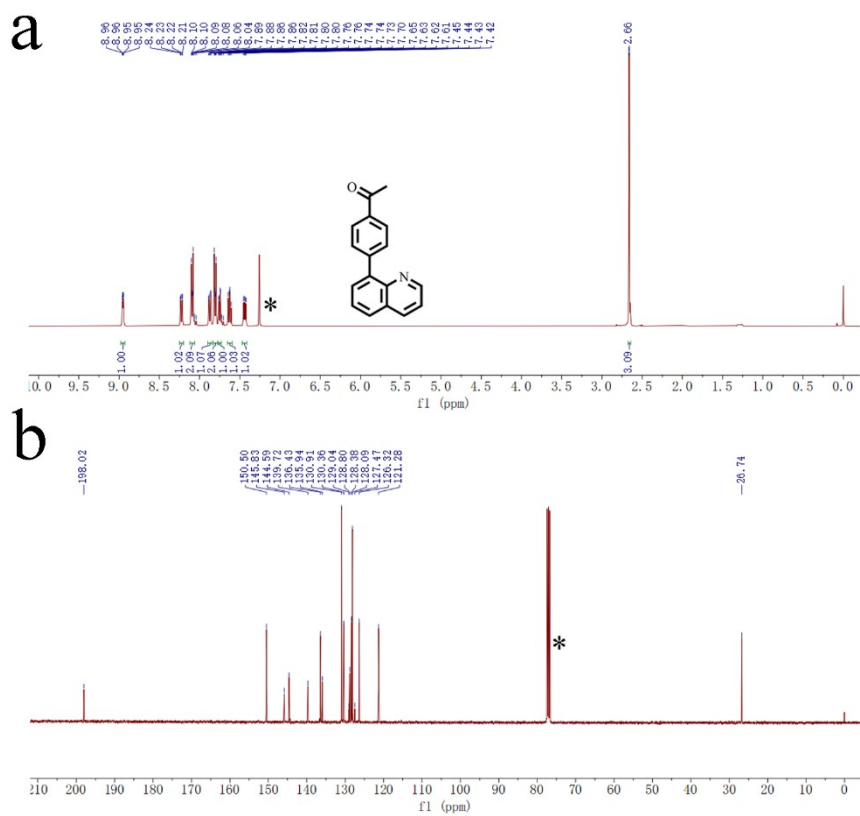

**Figure S1. a**  $^1\text{H}$  and **b**  $^{13}\text{C}$  NMR spectra of QLP-8. The solvent peaks were marked as asterisk.

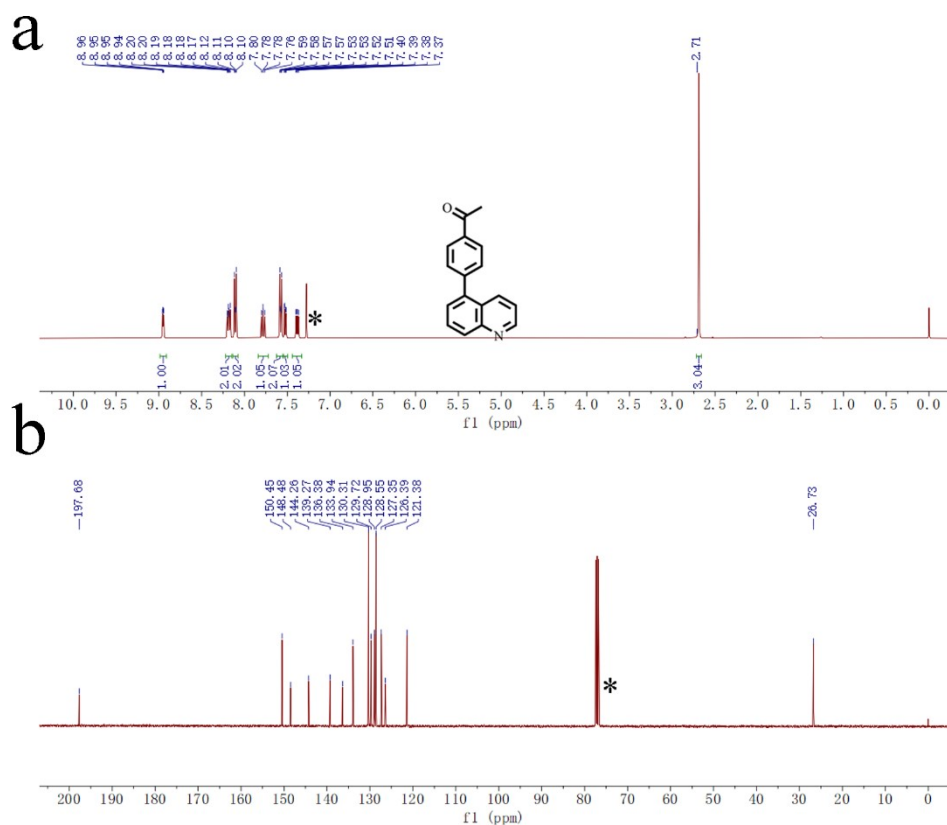

**Figure S2. a**  $^1\text{H}$  and **b**  $^{13}\text{C}$  NMR spectra of QLP-5. The solvent peaks were marked as asterisk.

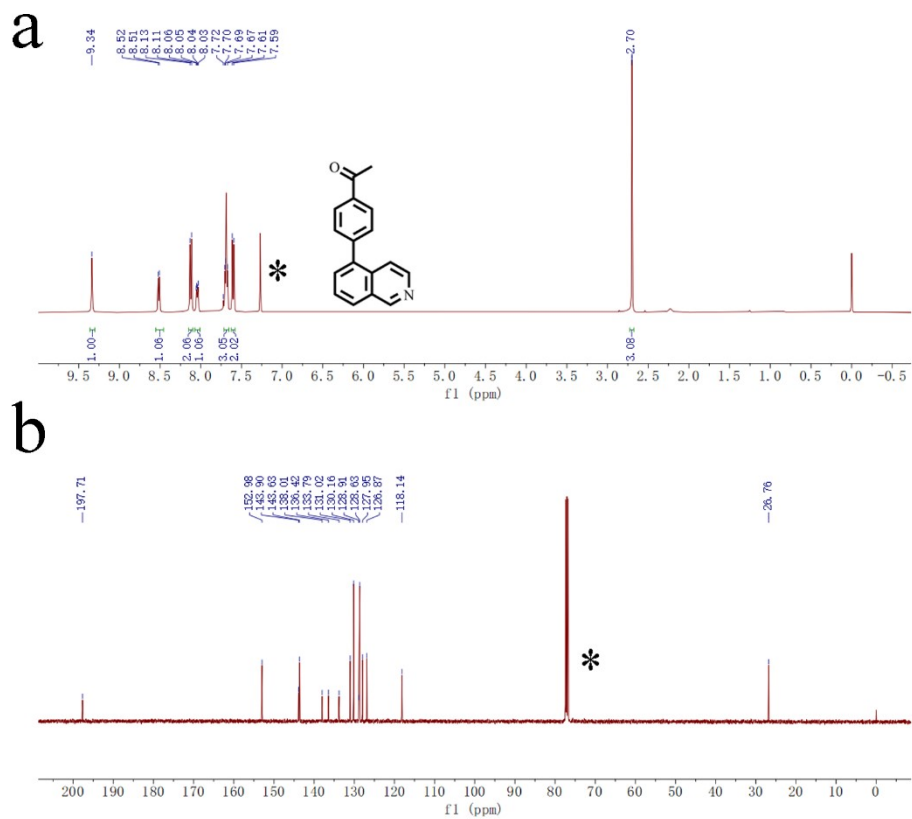

**Figure S3. a**  $^1\text{H}$  and **b**  $^{13}\text{C}$  NMR spectra of IQL-5. The solvent peaks were marked as asterisk.





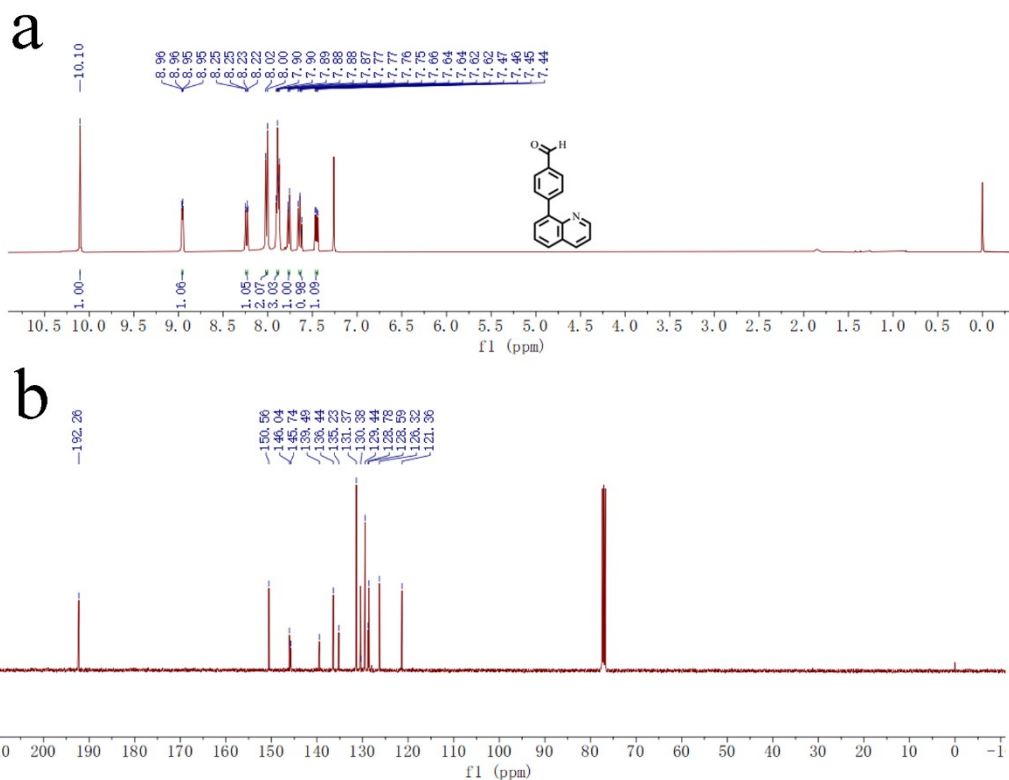

Figure S6. **a**  $^1\text{H}$  and **b**  $^{13}\text{C}$  NMR spectra of QLB-8 the solvent peaks were marked as asterisk.

## High Resolution Mass Spectrometry

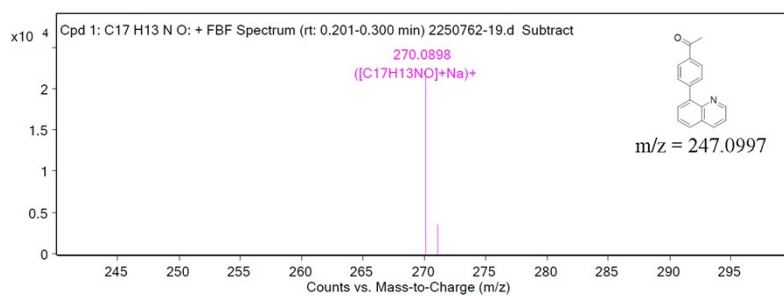

Figure S7. High resolution mass spectrum of QLP-8 with chemical ionization.

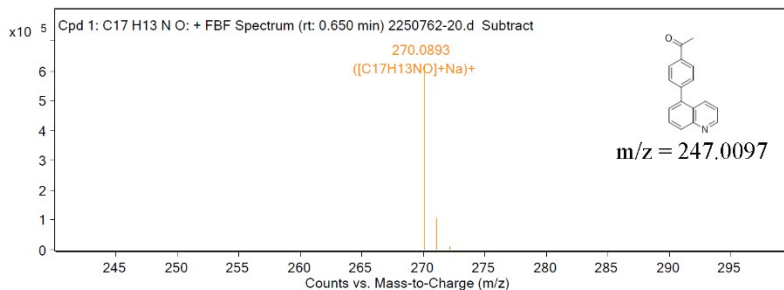

Figure S8. High resolution mass spectrum of QLP-5 with chemical ionization.

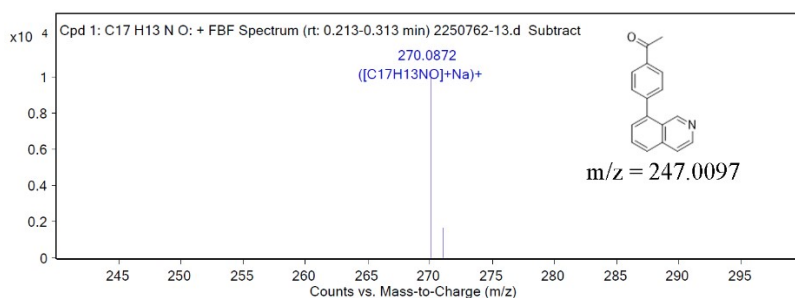

**Figure S9.** High resolution mass spectrum of IQL-5 with chemical ionization.

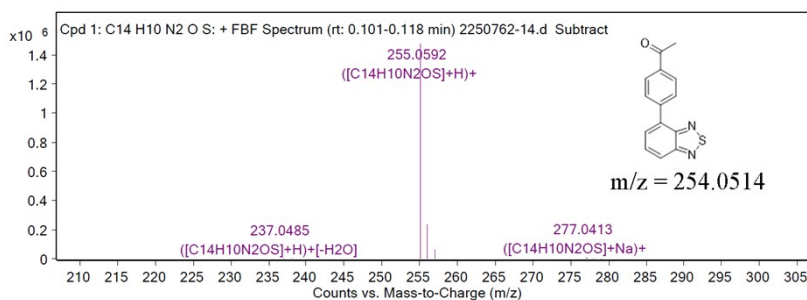

**Figure S10.** High resolution mass spectrum of BTD-4 with chemical ionization.

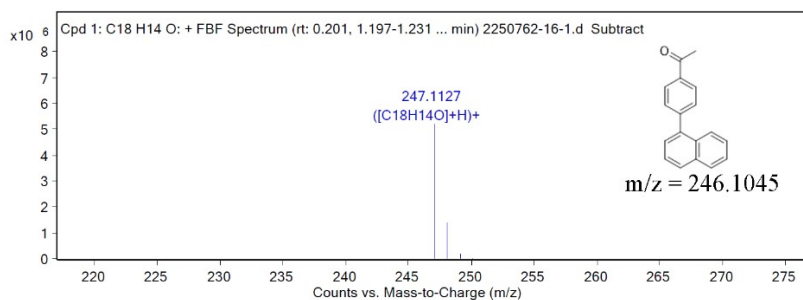

**Figure S11.** High resolution mass spectrum of NTP-1 with chemical ionization.

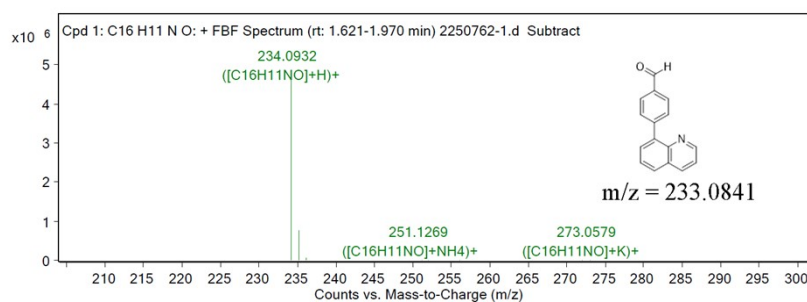

**Figure S12.** High resolution mass spectrum of QLB-8 with chemical ionization.

## Size Distribution

**Table S1.** The size distribution of QLP-8 in the different solvent systems. Concentration =  $10^{-5}$  M.

|                                       | particle size (nm) | Polydispersity |
|---------------------------------------|--------------------|----------------|
| $V_{H_2O} : V_{THF} = 7:3$            | 356.3              | 0.047          |
| $V_{H_2O} : V_{THF} = 8:2$            | 881.5              | 0.031          |
| $V_{H_2O} : V_{THF} = 9:1$            | 1431.5             | 0.024          |
| $V_{n\text{-hexane}} : V_{THF} = 9:1$ | 989.9              | 0.065          |
| $V_{D_2O} : V_{THF} = 9:1$            | 1123.5             | 0.076          |

**Table S2.** The size distribution of QLP-5 in the different solvent systems. Concentration =  $10^{-5}$  M.

|                                       | particle size (nm) | Polydispersity |
|---------------------------------------|--------------------|----------------|
| $V_{H_2O} : V_{THF} = 7:3$            | 298.5              | 0.048          |
| $V_{H_2O} : V_{THF} = 8:2$            | 688.7              | 0.078          |
| $V_{H_2O} : V_{THF} = 9:1$            | 998.2              | 0.005          |
| $V_{n\text{-hexane}} : V_{THF} = 9:1$ | 889.3              | 0.031          |
| $V_{D_2O} : V_{THF} = 9:1$            | 989.8              | 0.088          |

**Table S3.** The size distribution of IQL-5 in the different solvent systems. Concentration =  $10^{-5}$  M.

|                                       | particle size (nm) | Polydispersity |
|---------------------------------------|--------------------|----------------|
| $V_{H_2O} : V_{THF} = 7:3$            | 332.7              | 0.077          |
| $V_{H_2O} : V_{THF} = 8:2$            | 858.6              | 0.004          |
| $V_{H_2O} : V_{THF} = 9:1$            | 1323.5             | 0.032          |
| $V_{n\text{-hexane}} : V_{THF} = 9:1$ | 969.5              | 0.029          |
| $V_{D_2O} : V_{THF} = 9:1$            | 1003.2             | 0.058          |

**Table S4.** The size distribution of BTD-4 in the different solvent systems. Concentration =  $10^{-5}$  M.

|                                       | particle size (nm) | Polydispersity |
|---------------------------------------|--------------------|----------------|
| $V_{H_2O} : V_{THF} = 7:3$            | 199.8              | 0.023          |
| $V_{H_2O} : V_{THF} = 8:2$            | 458.6              | 0.088          |
| $V_{H_2O} : V_{THF} = 9:1$            | 887.2              | 0.046          |
| $V_{n\text{-hexane}} : V_{THF} = 9:1$ | 677.4              | 0.084          |
| $V_{D_2O} : V_{THF} = 9:1$            | 798.5              | 0.057          |

**Table S5.** The size distribution of NTP-1 in the different solvent systems. Concentration =  $10^{-5}$  M.

|                                       | particle size (nm) | Polydispersity |
|---------------------------------------|--------------------|----------------|
| $V_{H_2O} : V_{THF} = 7:3$            | 488.7              | 0.102          |
| $V_{H_2O} : V_{THF} = 8:2$            | 996.1              | 0.125          |
| $V_{H_2O} : V_{THF} = 9:1$            | 1835.6             | 0.166          |
| $V_{n\text{-hexane}} : V_{THF} = 9:1$ | 1063.6             | 0.096          |
| $V_{D_2O} : V_{THF} = 9:1$            | 1336.4             | 0.112          |

**Table S6.** The size distribution of QLB-8 in the different solvent systems. Concentration =  $10^{-5}$  M.

|                                                 | particle size (nm) | Polydispersity |
|-------------------------------------------------|--------------------|----------------|
| $V_{\text{H}_2\text{O}} : V_{\text{THF}} = 7:3$ | 332.1              | 0.018          |
| $V_{\text{H}_2\text{O}} : V_{\text{THF}} = 8:2$ | 554.4              | 0.022          |
| $V_{\text{H}_2\text{O}} : V_{\text{THF}} = 9:1$ | 980.2              | 0.046          |
| $V_{n\text{-hexane}} : V_{\text{THF}} = 9:1$    | 680.4              | 0.032          |
| $V_{\text{D}_2\text{O}} : V_{\text{THF}} = 9:1$ | 798.8              | 0.042          |

## Spectroscopic Data

### UV-vis Absorption Spectra

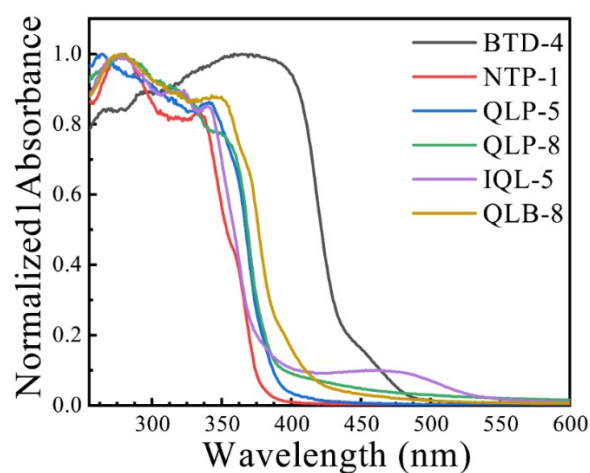

**Figure S13.** The solid-state UV-vis absorption spectra of compounds.

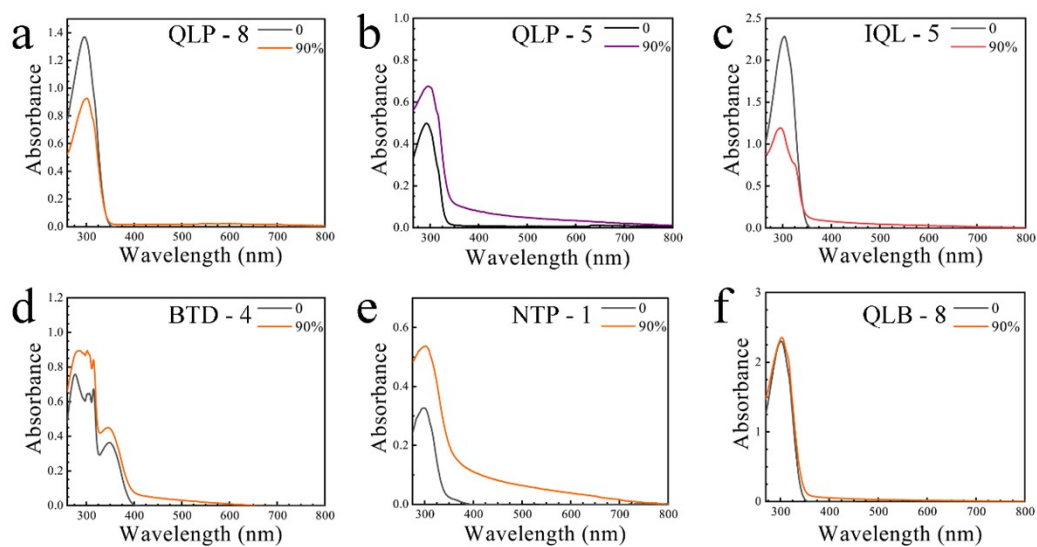

**Figure S14.** a-f The UV-vis absorption spectra of compounds in different water fraction.

## Solid State Excitation and Emission Spectra

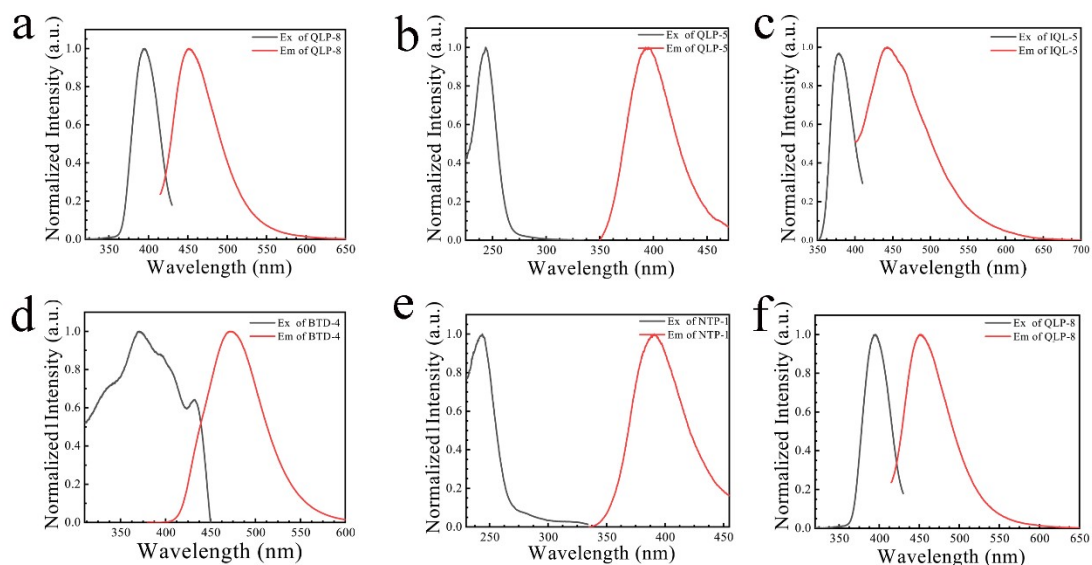

Figure S15. The solid-state excitation and emission wavelength of compounds.

## Fluorescence Lifetime and Quantum Yield.

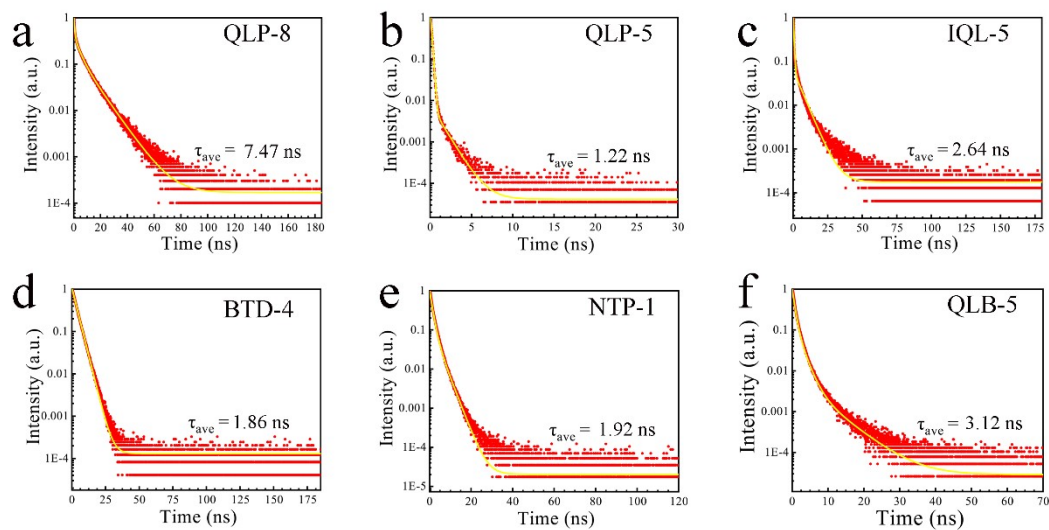

Figure S16. The solid-state fluorescence lifetime of compounds.

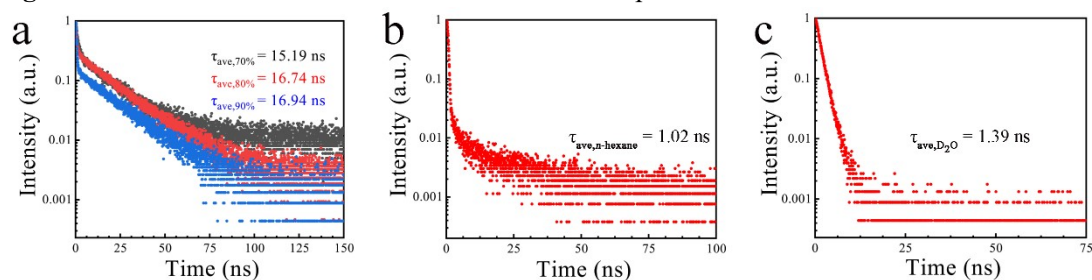

**Figure S17. a.** The lifetime of QLP-8 in different water fraction, **b** and **c** lifetime of QLP-8 use *n*-hexane and D<sub>2</sub>O as poor solvent (the poor solvent volume ratio = 90%).

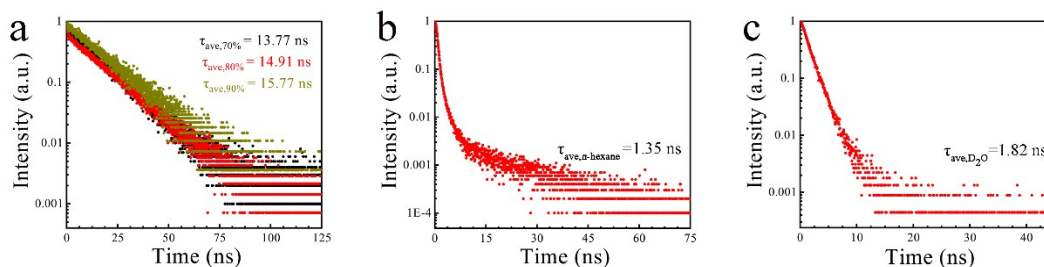

**Figure S18. a.** The lifetime of QLP-5 in different water fraction, **b** and **c** lifetime of QLP-5 use *n*-hexane and D<sub>2</sub>O as poor solvent (the poor solvent volume ratio = 90%).

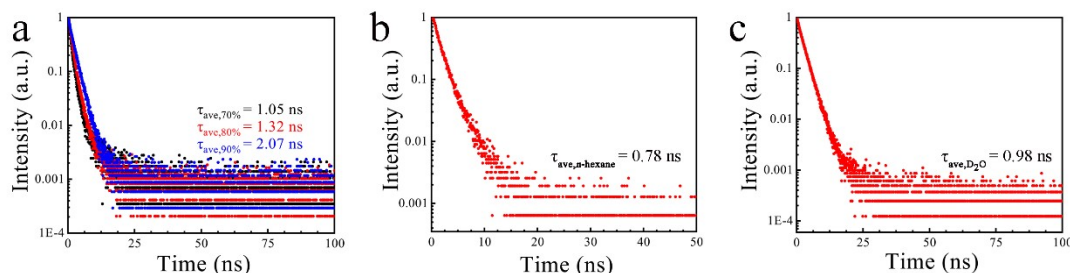

**Figure S19. a.** The lifetime of IQL-5 in different water fraction, **b** and **c** lifetime of IQL-5 use *n*-hexane and D<sub>2</sub>O as poor solvent (the poor solvent volume ratio = 90%).

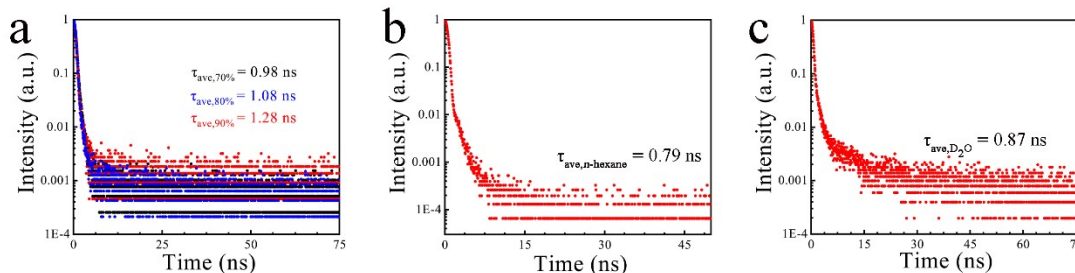

**Figure S20. a.** The lifetime of BTD-4 in different water fraction, **b** and **c** lifetime of BTD-4 use *n*-hexane and D<sub>2</sub>O as poor solvent (the poor solvent volume ratio = 90%).

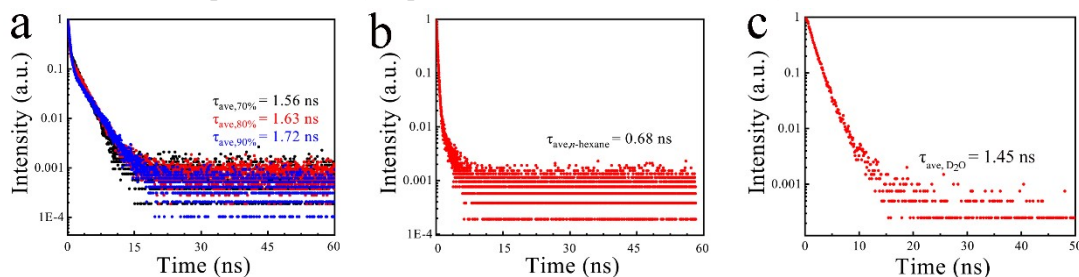

**Figure S21. a.** The lifetime of NTP-1 in different water fraction, **b** and **c** lifetime of NTP-1 use *n*-hexane and D<sub>2</sub>O as poor solvent (the poor solvent volume ratio = 90%).



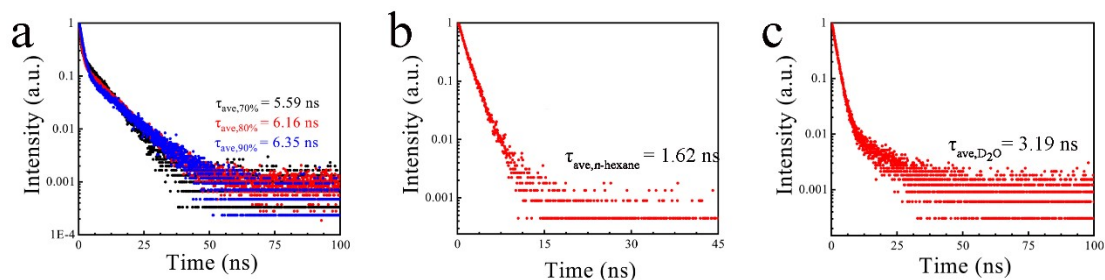

**Figure S22.** **a.** The lifetime of QLB-8 in different water fraction, **b** and **c** lifetime of QLB-8 use *n*-hexane and D<sub>2</sub>O as poor solvent (the poor solvent volume ratio = 90%).

**Table S7.** The photophysical parameters of QLP-5.  $\Phi_f$  = fluorescence quantum yield,  $k_r$  = radiative decay rate constant =  $\Phi_f / \tau_f$ ,  $k_{nr}$  = nonradiative decay rate constant =  $(1 - \Phi_f) / \tau_f$ , where  $\tau_f$  = fluorescence lifetime.

|                                                       | $\tau_f$ (ns) | $\Phi_f$ (%) | $k_r$ ( $\times 10^6$ s <sup>-1</sup> ) | $k_{nr}$ ( $\times 10^6$ s <sup>-1</sup> ) |
|-------------------------------------------------------|---------------|--------------|-----------------------------------------|--------------------------------------------|
| V <sub>H<sub>2</sub>O</sub> : V <sub>THF</sub> = 7:3  | 13.77         | 3.11         | 2.25                                    | 70.37                                      |
| V <sub>H<sub>2</sub>O</sub> : V <sub>THF</sub> = 8:2  | 14.91         | 6.32         | 4.23                                    | 62.84                                      |
| V <sub>H<sub>2</sub>O</sub> : V <sub>THF</sub> = 9:1  | 15.77         | 10.24        | 6.47                                    | 56.94                                      |
| V <sub><i>n</i>-hexane</sub> : V <sub>THF</sub> = 9:1 | 1.35          | 1.12         | 8.15                                    | 732.59                                     |
| V <sub>D<sub>2</sub>O</sub> : V <sub>THF</sub> = 9:1  | 1.82          | 4.21         | 23.08                                   | 526.37                                     |

**Table S8.** The photophysical parameters of IQL-5.  $\Phi_f$  = fluorescence quantum yield,  $k_r$  = radiative decay rate constant =  $\Phi_f / \tau_f$ ,  $k_{nr}$  = nonradiative decay rate constant =  $(1 - \Phi_f) / \tau_f$ , where  $\tau_f$  = fluorescence lifetime.

|                                                       | $\tau_f$ (ns) | $\Phi_f$ (%) | $k_r$ ( $\times 10^6$ s <sup>-1</sup> ) | $k_{nr}$ ( $\times 10^6$ s <sup>-1</sup> ) |
|-------------------------------------------------------|---------------|--------------|-----------------------------------------|--------------------------------------------|
| V <sub>H<sub>2</sub>O</sub> : V <sub>THF</sub> = 7:3  | 1.05          | 3.32         | 31.62                                   | 920.76                                     |
| V <sub>H<sub>2</sub>O</sub> : V <sub>THF</sub> = 8:2  | 1.32          | 8.56         | 64.85                                   | 692.73                                     |
| V <sub>H<sub>2</sub>O</sub> : V <sub>THF</sub> = 9:1  | 2.07          | 15.33        | 74.06                                   | 409.03                                     |
| V <sub><i>n</i>-hexane</sub> : V <sub>THF</sub> = 9:1 | 0.78          | 1.25         | 16.03                                   | 1266.03                                    |
| V <sub>D<sub>2</sub>O</sub> : V <sub>THF</sub> = 9:1  | 0.98          | 8.77         | 89.49                                   | 930.92                                     |

**Table S9.** The photophysical parameters of BTD-4.  $\Phi_f$  = fluorescence quantum yield,  $k_r$  = radiative decay rate constant =  $\Phi_f / \tau_f$ ,  $k_{nr}$  = nonradiative decay rate constant =  $(1 - \Phi_f) / \tau_f$ , where  $\tau_f$  = fluorescence lifetime.

|                                                       | $\tau_f$ (ns) | $\Phi_f$ (%) | $k_r$ ( $\times 10^6$ s <sup>-1</sup> ) | $k_{nr}$ ( $\times 10^6$ s <sup>-1</sup> ) |
|-------------------------------------------------------|---------------|--------------|-----------------------------------------|--------------------------------------------|
| V <sub>H<sub>2</sub>O</sub> : V <sub>THF</sub> = 7:3  | 0.98          | 20.77        | 211.94                                  | 808.47                                     |
| V <sub>H<sub>2</sub>O</sub> : V <sub>THF</sub> = 8:2  | 1.08          | 30.23        | 279.90                                  | 646.02                                     |
| V <sub>H<sub>2</sub>O</sub> : V <sub>THF</sub> = 9:1  | 1.28          | 42.2         | 329.68                                  | 451.56                                     |
| V <sub><i>n</i>-hexane</sub> : V <sub>THF</sub> = 9:1 | 0.79          | 18.88        | 238.99                                  | 1026.84                                    |
| V <sub>D<sub>2</sub>O</sub> : V <sub>THF</sub> = 9:1  | 0.87          | 35.33        | 406.09                                  | 743.33                                     |

**Table S10.** The photophysical parameters of NTP-1.  $\Phi_f$  = fluorescence quantum yield,  $k_r$  = radiative decay rate constant =  $\Phi_f / \tau_f$ ,  $k_{nr}$  = nonradiative decay rate constant =  $(1 - \Phi_f) / \tau_f$ , where  $\tau_f$  =



fluorescence lifetime.

|                                                       | $\tau_f$ (ns) | $\Phi_f$ (%) | $k_r$ ( $\times 10^6$ s $^{-1}$ ) | $k_{nr}$ ( $\times 10^6$ s $^{-1}$ ) |
|-------------------------------------------------------|---------------|--------------|-----------------------------------|--------------------------------------|
| V <sub>H<sub>2</sub>O</sub> : V <sub>THF</sub> = 7:3  | 1.56          | 1.98         | 12.69                             | 628.33                               |
| V <sub>H<sub>2</sub>O</sub> : V <sub>THF</sub> = 8:2  | 1.63          | 3.44         | 21.10                             | 592.39                               |
| V <sub>H<sub>2</sub>O</sub> : V <sub>THF</sub> = 9:1  | 1.72          | 6.77         | 39.36                             | 542.03                               |
| V <sub><i>n</i>-hexane</sub> : V <sub>THF</sub> = 9:1 | 0.68          | 1.11         | 16.32                             | 1454.26                              |
| V <sub>D<sub>2</sub>O</sub> : V <sub>THF</sub> = 9:1  | 1.45          | 4.88         | 33.66                             | 656.00                               |

**Table S11.** The photophysical parameters of QLB-8.  $\Phi_f$  = fluorescence quantum yield,  $k_r$  = radiative decay rate constant =  $\Phi_f / \tau_f$ ,  $k_{nr}$  = nonradiative decay rate constant =  $(1 - \Phi_f) / \tau_f$ , where  $\tau_f$  = fluorescence lifetime.

|                                                       | $\tau_f$ (ns) | $\Phi_f$ (%) | $k_r$ ( $\times 10^6$ s $^{-1}$ ) | $k_{nr}$ ( $\times 10^6$ s $^{-1}$ ) |
|-------------------------------------------------------|---------------|--------------|-----------------------------------|--------------------------------------|
| V <sub>H<sub>2</sub>O</sub> : V <sub>THF</sub> = 7:3  | 5.59          | 7.33         | 13.11                             | 165.78                               |
| V <sub>H<sub>2</sub>O</sub> : V <sub>THF</sub> = 8:2  | 6.16          | 18.58        | 30.16                             | 132.18                               |
| V <sub>H<sub>2</sub>O</sub> : V <sub>THF</sub> = 9:1  | 6.35          | 23.46        | 36.94                             | 120.94                               |
| V <sub><i>n</i>-hexane</sub> : V <sub>THF</sub> = 9:1 | 1.62          | 1.03         | 6.35                              | 610.93                               |
| V <sub>D<sub>2</sub>O</sub> : V <sub>THF</sub> = 9:1  | 3.19          | 15.35        | 48.11                             | 265.36                               |

## Other spectral data

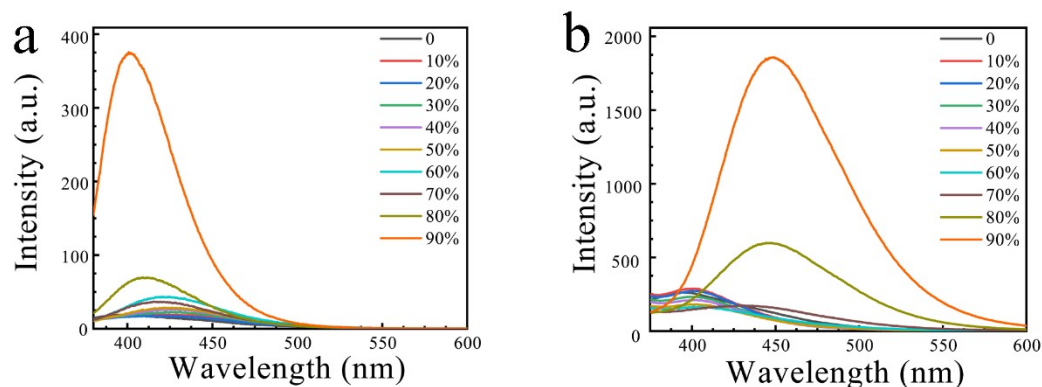

**Figure S23.** **a.** PL spectra of QLP-8 in *n*-hexane/THF mixtures with different *n*-hexane fractions.  $c = 10^{-5}$  M,  $\lambda_{ex} = 325$  nm. **b.** PL spectra of QLP-8 in D<sub>2</sub>O/THF mixtures with different D<sub>2</sub>O fractions.  $c = 10^{-5}$  M,  $\lambda_{ex} = 345$  nm.

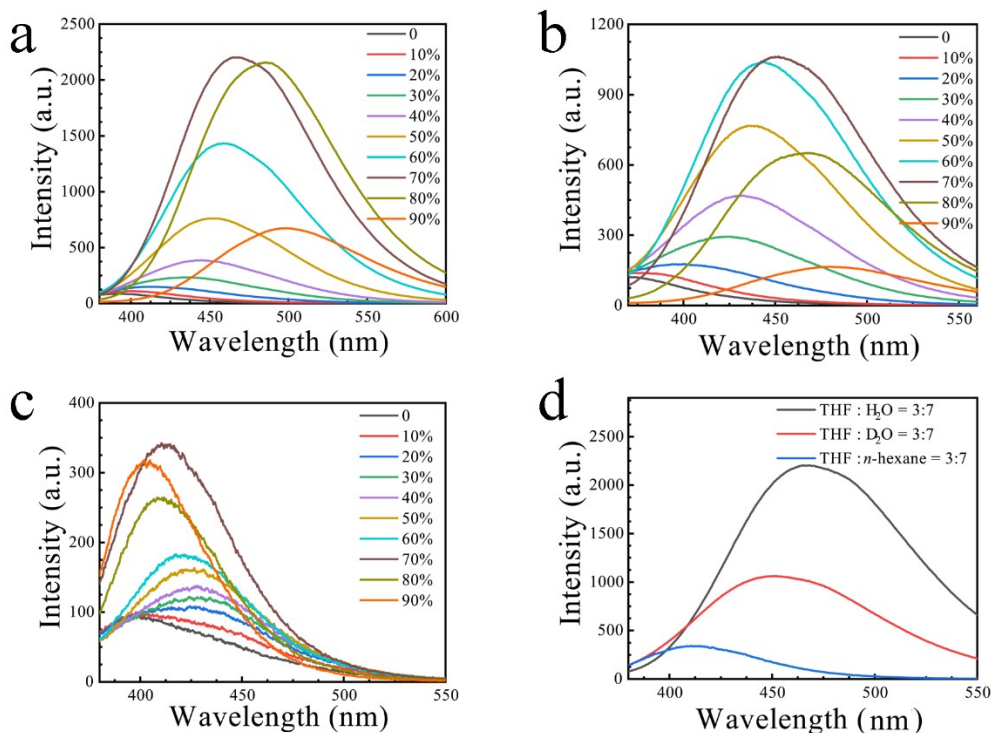

**Figure S24.** **a.** PL spectra of NTP-1 in H<sub>2</sub>O/THF mixtures with different water fractions ( $fw$ ).  $c = 10^{-5}$  M,  $\lambda_{ex} = 305$  nm. **b.** PL spectra of NTP-1 in D<sub>2</sub>O/THF mixtures with different D<sub>2</sub>O fractions.  $c = 10^{-5}$  M,  $\lambda_{ex} = 325$  nm. **c.** PL spectra of NTP-1 in *n*-hexane/THF mixtures with different *n*-hexane fractions.  $c = 10^{-5}$  M,  $\lambda_{ex} = 305$  nm. **d.** PL spectra of NTP-1 in different poor solvent under the same condition.

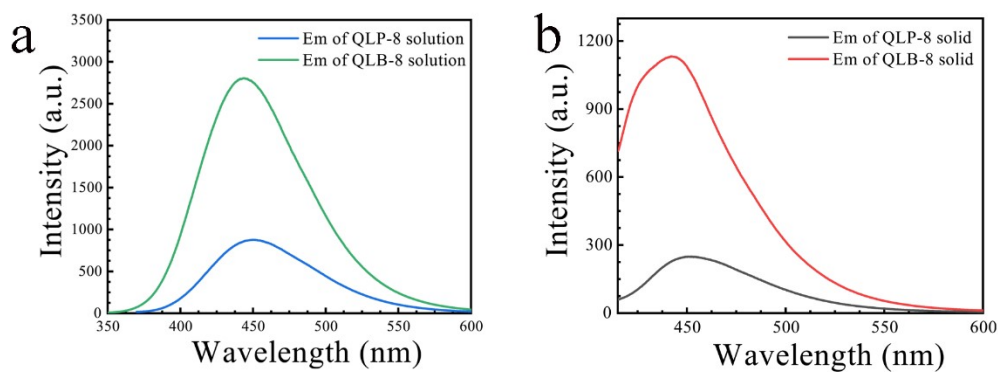

**Figure S25.** **a.** PL spectra of QLP-8 and QLB-8 in the solution with the concentration of  $10^{-5}$  M,  $\lambda_{ex,QLP-8} = 356.0$  nm,  $\lambda_{ex,QLB-8} = 370.0$  nm. **b.** PL spectra of QLP-8 and QLB-8 in the solid state,  $\lambda_{ex,QLP-8} = 395.0$  nm,  $\lambda_{ex,QLB-8} = 402.2$  nm.

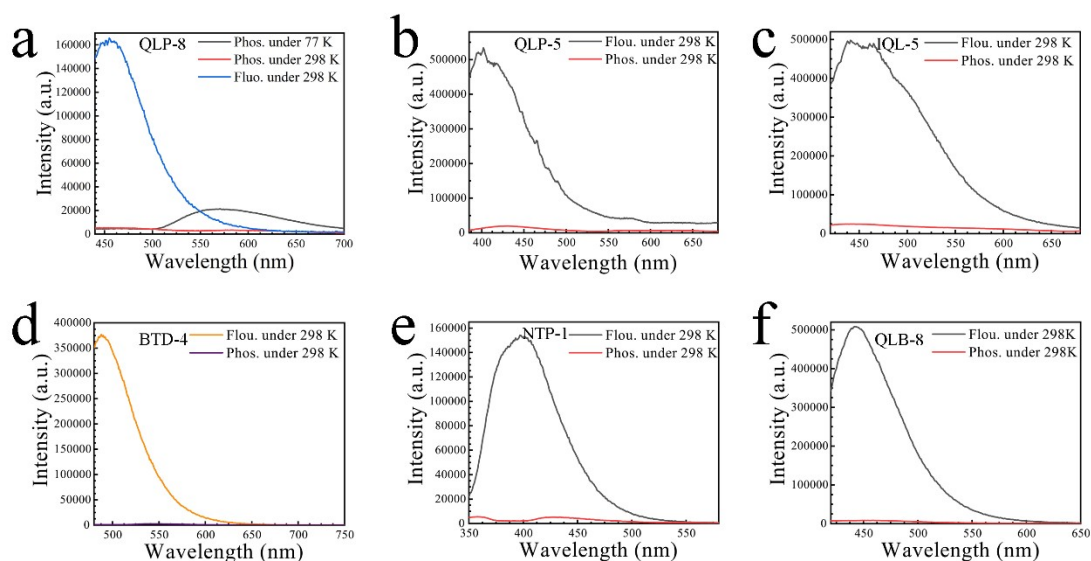

**Figure S26.** a-f The fluorescence spectra and phosphorescence spectra of compounds.

## The Crystal Structure of Compounds.

**Table S12.** Summary of crystallographic data and structural refinements

| Compound                                                         | QLP-8                              | QLP-5                              | IQL-5                              | BTD-4                                             |
|------------------------------------------------------------------|------------------------------------|------------------------------------|------------------------------------|---------------------------------------------------|
| CCDC number                                                      | 2111659                            | 2111734                            | 2111661                            | 2111663                                           |
| Empirical formula                                                | C <sub>17</sub> H <sub>13</sub> NO | C <sub>17</sub> H <sub>13</sub> NO | C <sub>17</sub> H <sub>13</sub> NO | C <sub>14</sub> H <sub>10</sub> N <sub>2</sub> OS |
| Formula weight                                                   | 247.28                             | 247.28                             | 247.28                             | 254.30                                            |
| Temperature/K                                                    | 101(3)                             | 301.08(10)                         | 193.0                              | 100.01(10)                                        |
| Crystal system                                                   | triclinic                          | monoclinic                         | monoclinic                         | monoclinic                                        |
| Space group                                                      | P-1                                | P2 <sub>1</sub> /c                 | P2 <sub>1</sub> /c                 | P2 <sub>1</sub> /c                                |
| <i>a</i> /Å                                                      | 3.80620(10)                        | 17.7346(3)                         | 11.2612(10)                        | 3.8241(2)                                         |
| <i>b</i> /Å                                                      | 12.7167(3)                         | 14.1145(2)                         | 7.3739(8)                          | 21.5934(8)                                        |
| <i>c</i> /Å                                                      | 13.5789(2)                         | 16.7364(3)                         | 15.4845(15)                        | 13.7628(5)                                        |
| $\alpha$ /°                                                      | 67.404(2)                          | 90                                 | 90                                 | 90                                                |
| $\beta$ /°                                                       | 87.172(2)                          | 114.410(2)                         | 92.600(4)                          | 94.180(3)                                         |
| $\gamma$ /°                                                      | 89.413(2)                          | 90                                 | 90                                 | 90                                                |
| Volume/Å <sup>3</sup>                                            | 606.03(2)                          | 3814.89(12)                        | 1284.5(2)                          | 1133.44(8)                                        |
| <i>Z</i>                                                         | 2                                  | 12                                 | 4                                  | 4                                                 |
| Density/ g.cm <sup>-3</sup>                                      | 1.355                              | 1.292                              | 1.279                              | 1.490                                             |
| F (000)                                                          | 260.0                              | 1560.0                             | 520.0                              | 528.0                                             |
| $\mu$ /mm <sup>-1</sup>                                          | 0.665                              | 0.633                              | 0.080                              | 0.272                                             |
| Goodness-of-fit on F <sup>2</sup>                                | 1.074                              | 1.036                              | 1.017                              | 528.0                                             |
| <i>R</i> <sub>I</sub> [ <i>I</i> ≥ 2σ( <i>I</i> )] <sup>b</sup>  | 0.0608                             | 0.0508                             | 0.0564                             | 0.0408                                            |
| <i>wR</i> <sub>2</sub> [ <i>I</i> ≥ 2σ( <i>I</i> )] <sup>c</sup> | 0.1583                             | 0.1456                             | 0.1169                             | 0.1237                                            |
| <i>R</i> <sub>I</sub> [all data] <sup>b</sup>                    | 0.0625                             | 0.0635                             | 0.1044                             | 0.0521                                            |

---

|                                |        |        |        |        |
|--------------------------------|--------|--------|--------|--------|
| $wR_2$ [all data] <sup>c</sup> | 0.1595 | 0.1564 | 0.1433 | 0.1332 |
|--------------------------------|--------|--------|--------|--------|

---

---

| Compound                                    | QLB-8                              |
|---------------------------------------------|------------------------------------|
| CCDC number                                 | 2111665                            |
| Empirical formula                           | C <sub>16</sub> H <sub>11</sub> NO |
| Formula weight                              | 233.26                             |
| Temperature/K                               | 300.92(10)                         |
| Crystal system                              | monoclinic                         |
| Space group                                 | P2 <sub>1</sub> /c                 |
| <i>a</i> /Å                                 | 10.7848(8)                         |
| <i>b</i> /Å                                 | 7.4289(4)                          |
| <i>c</i> /Å                                 | 14.9066(9)                         |
| $\alpha$ /°                                 | 90                                 |
| $\beta$ /°                                  | 96.205(7)                          |
| $\gamma$ /°                                 | 90                                 |
| Volume/Å <sup>3</sup>                       | 1187.31(13)                        |
| <i>Z</i>                                    | 4                                  |
| Density/ g.cm <sup>-3</sup>                 | 1.305                              |
| F (000)                                     | 488                                |
| $\mu$ /mm <sup>-1</sup>                     | 0.082                              |
| Goodness-of-fit on F <sup>2</sup>           | 1.068                              |
| $R_I$ [ $I \geq 2\sigma(I)$ ] <sup>b</sup>  | 0.0444                             |
| $wR_2$ [ $I \geq 2\sigma(I)$ ] <sup>c</sup> | 0.1107                             |
| $R_I$ [all data] <sup>b</sup>               | 0.0733                             |
| $wR_2$ [all data] <sup>c</sup>              | 0.1241                             |

---

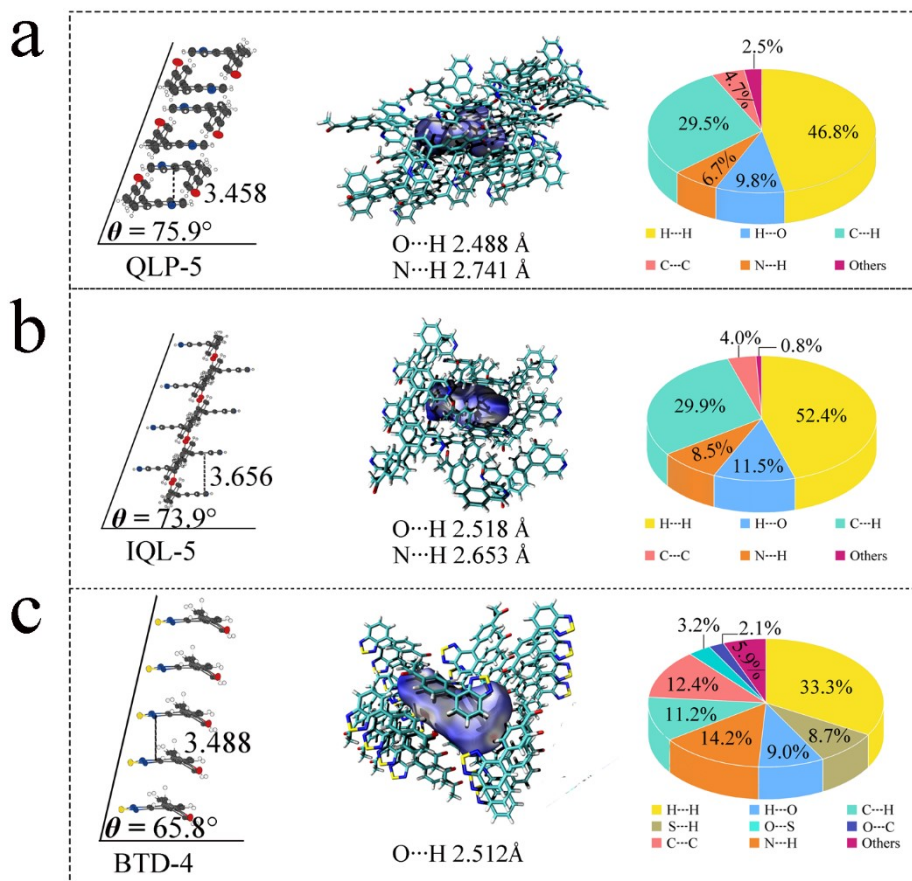

**Figure S27.** (left): Crystal structure. O atoms (red), N atoms (blue), C atoms (black), H atoms (white), (middle): A view of the Hirshfeld surface mapped over  $d_{\text{norm}}$ , (right): The Pie-charts: Relative contributions of various intermolecular interactions to the Hirshfeld surface area of QLP-5, IQL-5 and BTD-4.

## Calculation

**Table S13.** Calculated C–C Atomic Distances and dihedral angles of compounds and their derivatives in the ground ( $S_0$ ) and excited states ( $S_1$ ) based on isolated phase, calculated by the TD-DFT,  $\omega$ -b97xd/Def2-TZVP level, gaussian 09 program.

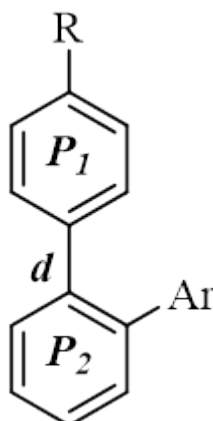

| compound | State | Atomic Distance ( $\text{\AA}$ ) $d$ | Dihedral Angle ( $^\circ$ ) $P_1$ and $P_2$ |
|----------|-------|--------------------------------------|---------------------------------------------|
| QLP-8    | $S_0$ | 1.47774                              | 47.56343                                    |
|          | $S_1$ | 1.47759                              | 47.79693                                    |
| QLP-5    | $S_0$ | 1.48940                              | 59.26306                                    |
|          | $S_1$ | 1.48070                              | 56.35363                                    |
| IQL-5    | $S_0$ | 1.48822                              | 57.92384                                    |
|          | $S_1$ | 1.47992                              | 55.58285                                    |
| BTD-4    | $S_0$ | 1.48035                              | 36.44156                                    |
|          | $S_1$ | 1.43569                              | 16.70690                                    |
| QLB-8    | $S_0$ | 1.48521                              | 45.41237                                    |
|          | $S_1$ | 1.47819                              | 48.47980                                    |
| NTP-1    | $S_0$ | 1.48464                              | 51.67438                                    |
|          | $S_1$ | 1.47797                              | 48.78484                                    |

**Table S14.** Vertical excitation of single compound at the geometry of  $S_{1, \min}$ .

| Compound | Electronic states                | Energy (eV) | Wavelength (nm) | Transition                                                   | Oscillator Strength ( $f$ ) |
|----------|----------------------------------|-------------|-----------------|--------------------------------------------------------------|-----------------------------|
| QLP-8    | $S_{1, \min}^1(n+\sigma, \pi^*)$ | 3.2856      | 377.36          | H-1 $\rightarrow$ L (56.2%)<br>H-1 $\rightarrow$ L+1 (31.0%) | 0.0003                      |
|          | $S_2^1(\pi, \pi^*)$              | 4.2662      | 290.62          | H $\rightarrow$ L (81.6%)                                    | 0.5174                      |
| QLP-5    | $S_{1, \min}^1(n+\sigma, \pi^*)$ | 3.3278      | 372.57          | H-1 $\rightarrow$ L (72.5%)<br>H-1 $\rightarrow$ L+1 (14.5%) | 0.0002                      |
|          | $S_2^1(\pi, \pi^*)$              | 4.4217      | 280.40          | H $\rightarrow$ L (78.3%)                                    | 0.5376                      |
| IQL-5    | $S_{1, \min}^1(n+\sigma, \pi^*)$ | 3.321       | 373.32          | H-1 $\rightarrow$ L (73.3%)<br>H-1 $\rightarrow$ L+1 (14.4%) | 0.0002                      |
|          | $S_2^1(\pi, \pi^*)$              | 4.3460      | 285.29          | H $\rightarrow$ L (72.6%)                                    | 0.2424                      |
| BTD-4    | $S_1^1(\pi, \pi^*)$              | 3.0827      | 402.19          | H $\rightarrow$ L (96.1%)                                    | 0.3055                      |
| NTP-1    | $S_{1, \min}^1(n+\sigma, \pi^*)$ | 3.3426      | 370.92          | H-1 $\rightarrow$ L (56.2%)<br>H-2 $\rightarrow$ L (22.8%)   | 0.0002                      |
|          | $S_2^1(\pi, \pi^*)$              | 4.3202      | 286.99          | H $\rightarrow$ L (75.7%)                                    | 0.4811                      |
| QLB-8    | $S_{1, \min}^1(n+\sigma, \pi^*)$ | 3.8558      | 321.56          | H-1 $\rightarrow$ L (60.5%)<br>H-1 $\rightarrow$ L+1 (26.2%) | 0.0002                      |
|          | $S_2^1(\pi, \pi^*)$              | 4.3162      | 287.25          | H $\rightarrow$ L (79.6%)                                    | 0.3035                      |

**Table S15.** Vertical excitation of single QLP-8 dimer in the crystal at the geometry of  $S_{1, \text{min}}$ .

| Electronic states   | Energy (eV) | Wavelength (nm) | Transition                           | Oscillator strength |
|---------------------|-------------|-----------------|--------------------------------------|---------------------|
| $S_1^1(\pi, \pi^*)$ | 2.8538      | 434.45          | H -> L (92.7%)                       | 0.0208              |
| $S_2^1(\pi, \pi^*)$ | 3.5889      | 345.47          | H -> L+1 (54.0%)<br>H-1 -> L (37.2%) | 1.8289              |

**Table S16.** Vertical excitation of single QLP-8 in SMD model at the geometry of  $S_{1, \text{min}}$ .

| solvent          | Excited states                         | Energy (eV) | Wavelength (nm) | Transition                             | Oscillator strength |
|------------------|----------------------------------------|-------------|-----------------|----------------------------------------|---------------------|
| THF              | $S_{1, \text{min}}^1(n+\sigma, \pi^*)$ | 3.6715      | 337.69          | H-3 -> L (41.4%)<br>H-4 -> L (34.9%)   | 0.0057              |
|                  | $S_2^1(\pi, \pi^*)$                    | 4.0753      | 304.23          | H -> L (77.8%)                         | 1.0649              |
| <i>n</i> -hexane | $S_{1, \text{min}}^1(n+\sigma, \pi^*)$ | 3.4240      | 362.10          | H-1 -> L (61.0%)<br>H-1 -> L+1 (26.3%) | 0.0002              |
|                  | $S_2^1(\pi, \pi^*)$                    | 4.2068      | 294.72          | H -> L (86.3%)                         | 0.7277              |
| $H_2O$           | $S_{1, \text{min}}^1(n+\sigma, \pi^*)$ | 3.6717      | 337.68          | H-3 -> L (41.2%)<br>H-4 -> L (35.1%)   | 0.0057              |
|                  | $S_2^1(\pi, \pi^*)$                    | 4.0754      | 304.23          | H -> L (77.8%)                         | 1.06480             |

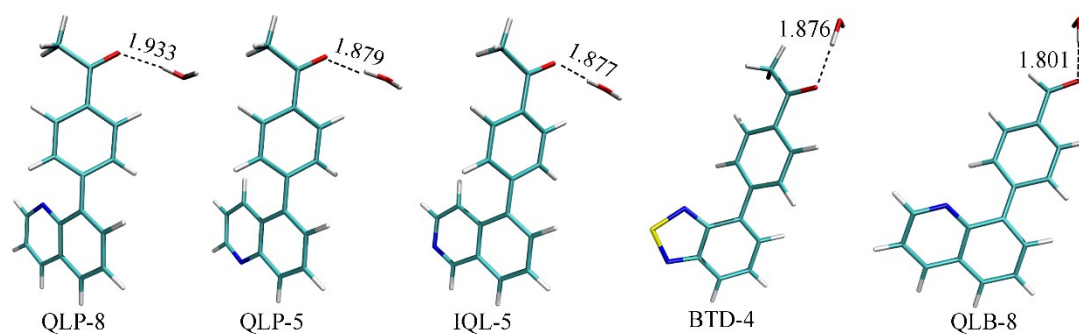**Figure S28.** The water molecule and the compounds structure, calculated by gaussian 09 program under  $\omega$ -b97xd/Def2-TZVP level.

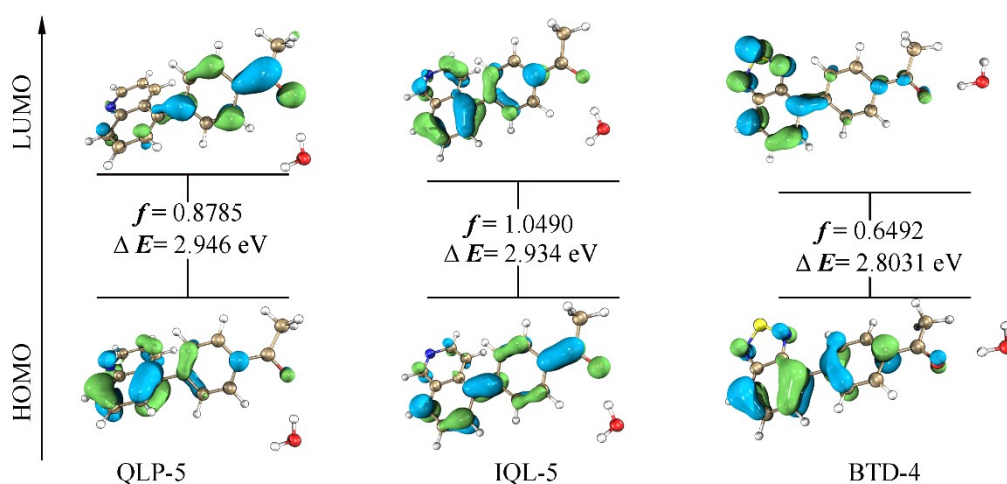

**Figure S29.** Optimized excited-state geometries of the water molecule and the compounds structure, calculated by TD-DFT method in gaussian 09 program under  $\omega$ -b97xd/Def2-TZVP level.

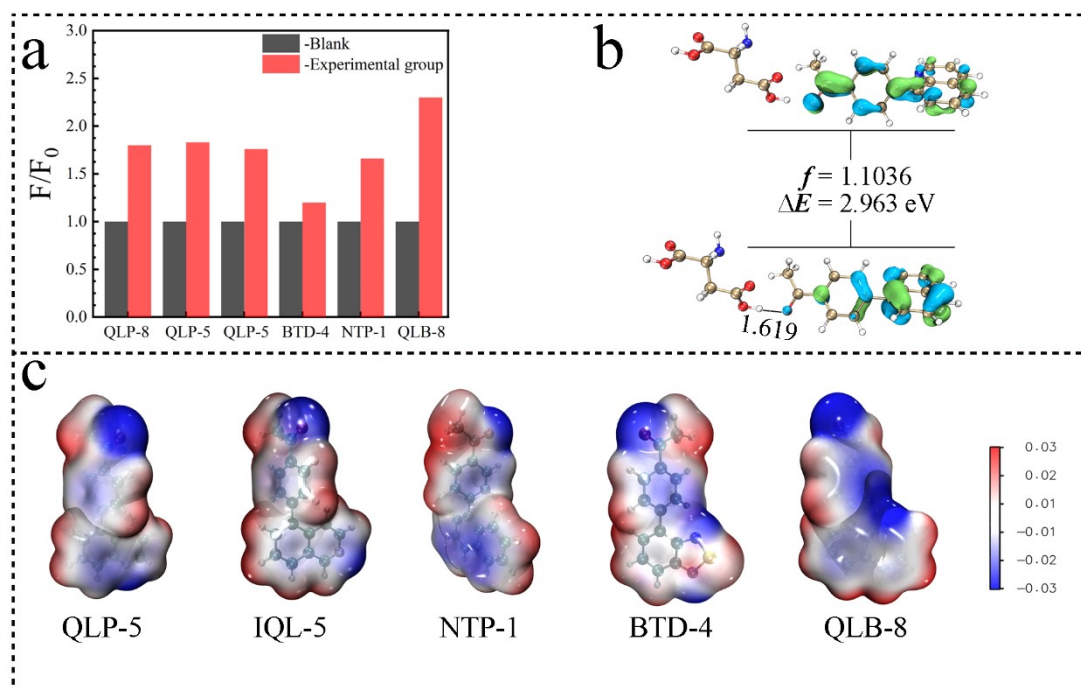

**Figure S30. a.** Fluorescence intensity histogram of aspartic acid detecting by different molecules. **b.** Natural transition orbitals of optimized excited-state geometries of aspartic-QLB-8 complex were calculated by the TD-DFT method at the  $\omega$ -b97xd/Def2-TZVP level, gaussian 09 program. **c.** Electrostatic potential (ESP) diagrams of QLP-5, IQL-5, NTP-1, BTD-4, QLB-8.



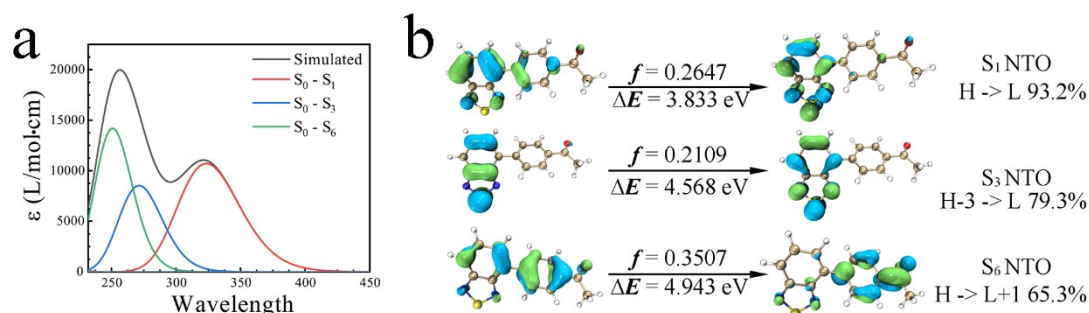

**Figure S31. a.** The UV-vis spectrum of BTD-4 by TD-DFT calculation. **b.** Charge distribution corresponding to different transition states, calculated by TD-DFT method in gaussian 09 program under  $\omega$ -b97xd/Def2-TZVP level.

## References

- (1) Gaussian 09, Revision E.01 M. J. Frisch, G. W. Trucks, H. B. Schlegel, G. E. Scuseria, M. A. Robb, J. R. Cheeseman, G. Scalmani, V. Barone, B. Mennucci, G. A. Petersson, H. Nakatsuji, M. Caricato, X. Li, H. P. Hratchian, A. F. Izmaylov, J. Bloino, G. Zheng, J. L. Sonnenberg, M. Hada, M. Ehara, K. Toyota, R. Fukuda, J. Hasegawa, M. Ishida, T. Nakajima, Y. Honda, O. Kitao, H. Nakai, T. Vreven, J. A. Montgomery, Jr., J. E. Peralta, F. Ogliaro, M. Bearpark, J. J. Heyd, E. Brothers, K. N. Kudin, V. N. Staroverov, T. Keith, R. Kobayashi, J. Normand, K. Raghavachari, A. Rendell, J. C. Burant, S. S. Iyengar, J. Tomasi, M. Cossi, N. Rega, J. M. Millam, M. Klene, J. E. Knox, J. B. Cross, V. Bakken, C. Adamo, J. Jaramillo, R. Gomperts, R. E. Stratmann, O. Yazyev, A. J. Austin, R. Cammi, C. Pomelli, J. W. Ochterski, R. L. Martin, K. Morokuma, V. G. Zakrzewski, G. A. Voth, P. Salvador, J. J. Dannenberg, S. Dapprich, A. D. Daniels, O. Farkas, J. B. Foresman, J. V. Ortiz, J. Cioslowski, and D. J. Fox, Gaussian, Inc., Wallingford CT, 2013.
- (2) Lu T, Chen F. Multiwfn: a multifunctional wavefunction analyzer[J]. Journal of computational chemistry, 2012, 33(5): 580-592.
- (3) Spackman, M. A.; Jayatilaka, D. Hirshfeld Surface Analysis. CrystEngComm, 2009, 11, 19-32.
- (4) Dolomanov, O.V.; Bourhis, L.J.; Gildea, R.J.; Howard, J.A.K.; Puschmann, H., OLEX2: A complete structure solution, refinement and analysis program (2009). J. Appl. Cryst., 42, 339-341
